# Supplementary material for: Discrete color centers in two-dimensional hexagonal boron nitride induced by fast neutron irradiation
Source: Royal Society of Chemistry journal article supplement (doi:10.1039/c9tc03695d), 2019-01-01
Supplement: c9tc03695d1.pdf [file c9tc03695d1.pdf]

# Discrete color centers in two-dimensional hexagonal boron nitride induced by fast neutron irradiation

Hui Zhang<sup>1,2,\*</sup>, Mu Lan<sup>1,2</sup>, Ge Tang<sup>1</sup>, Feiliang Chen<sup>1,2</sup>, Zhiwen Shu<sup>3</sup>, Fengxiang Chen<sup>4</sup>

and Mo Li<sup>1,2,\*</sup>

*1* Microsystem and Terahertz Research Center, China Academy of Engineering Physics, Chengdu 610200,

China.

*2* Institute of Electronic Engineering, China Academy of Engineering Physics, Chengdu 610200, China.

*3* College of Mechanical and Vehicle Engineering, Hunan University, Changsha 410082, China.

*4* Department of Physics, School of Science, Wuhan University of Technology, Wuhan 430070, China.

\* To whom correspondence should be addressed. E-mail: [zhanghui@mtrc.ac.cn](mailto:zhanghui@mtrc.ac.cn); [limo@mtrc.ac.cn](mailto:limo@mtrc.ac.cn).

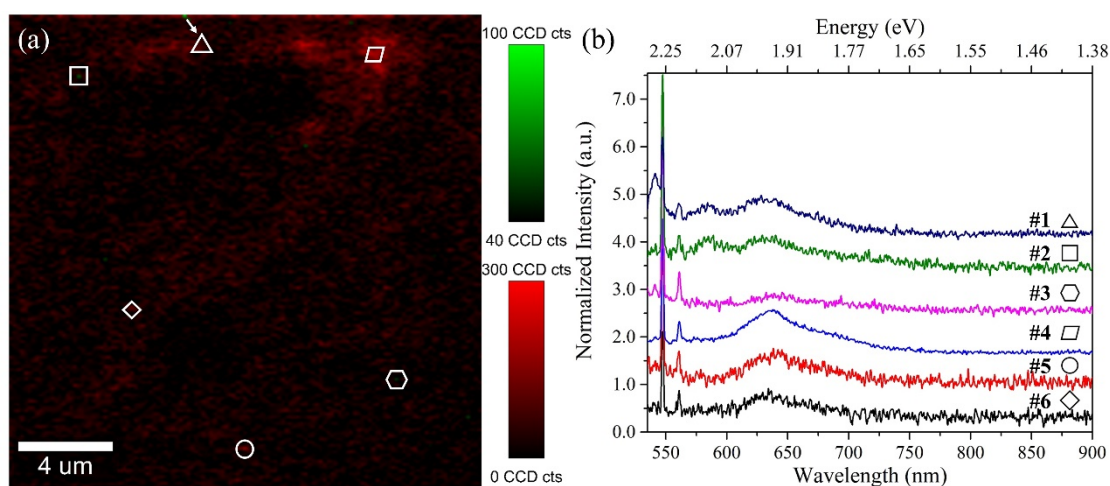

Figure S1: (a) A 2D spatial map of PL integrated intensity of an untreated sample. The green and red colors were corresponding to the integral intervals within 567.5-592.5 nm and 610-650 nm, respectively. PL spectra of selected points were shown in (b), corresponding to the points marked in (a).

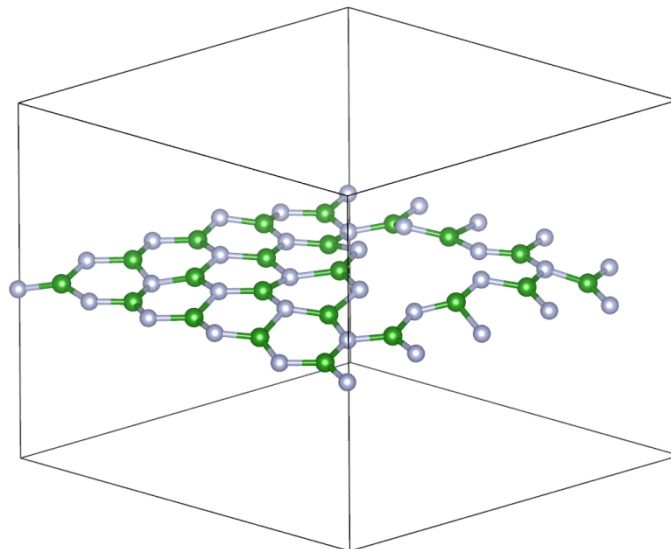

Figure S2: ab-initio molecular dynamics simulation of  $V_{B3NI}$ , which was taken on the defect supercell for 300 steps with time step of 3fs at 1000 K. The corresponding video of the simulation result can be found in the supplementary information Video S1.
